# Supplementary material for: Bub1 Is a Fission Yeast Kinetochore Scaffold Protein, and Is Sufficient to Recruit other Spindle Checkpoint Proteins to Ectopic Sites on Chromosomes
Source: PubMed Central journal article supplement (PMC2147072; doi:10.1371/journal.pone.0001342), 2007-12-19
Supplement: pone.0001342.s001.pdf [file pone.0001342.s001.pdf]

### Supplementary Table S1

**Number of Bub1-Tel/Mad3 dots co-localising with Ndc80 (KT, kinetochore)  
(shown as a %, 50 cells counted in total)**

|                     |                     |                     |                     |                       |                       |                       |
|---------------------|---------------------|---------------------|---------------------|-----------------------|-----------------------|-----------------------|
| 1B1/<br>1M3/<br>1KT | 2B1/<br>2M3/<br>1KT | 3B1/<br>3M3/<br>1KT | 4B1/<br>4M3/<br>1KT | 2B1/<br>2M3/<br>NO KT | 3B1/<br>3M3/<br>NO KT | 5B1/<br>5M3/<br>NO KT |
| 15                  | 37                  | 29                  | 11                  | 4                     | 2                     | 2                     |

e.g. 3B1/3M3/1KT means that 3 Bub1 foci were observed in a cell, and all co-localised with Mad3tdTomato, but that only one co-localised with Ndc80. NO KT means that none of the Bub1 or Mad3 foci co-localised with Ndc80.

The majority of cells contain multiple co-localising foci for Bub1-Tel and Mad3, and only one (or none) of these co-localised with Ndc80 (kinetochores).
