# Supplementary material for: Bub1 Is a Fission Yeast Kinetochore Scaffold Protein, and Is Sufficient to Recruit other Spindle Checkpoint Proteins to Ectopic Sites on Chromosomes
Source: PubMed Central journal article supplement (PMC2147072; doi:10.1371/journal.pone.0001342), 2007-12-19
Supplement: pone.0001342.s002.pdf [file pone.0001342.s002.pdf]

## Supplementary Table S2

**Number of Bub1-Tel/Bub3 dots co-localising with Ndc80 (KT, kinetochore)  
(shown as a %, 50 cells counted in total)**

| 1B1/<br>1B3/<br>1KT | 2B1/<br>2B3/<br>1KT | 3B1/<br>3B3/<br>1KT | 4B1/<br>4B3/<br>1KT | 1B1/<br>1B3/<br>NO KT | 2B1/<br>2B3/<br>NO KT | 3B1/<br>3B3/<br>NO KT | 5B1/<br>5B3/<br>NO KT |
|---------------------|---------------------|---------------------|---------------------|-----------------------|-----------------------|-----------------------|-----------------------|
| 32                  | 16                  | 16                  | 16                  | 8                     | 4                     | 6                     | 2                     |

The majority of cells contain multiple co-localising foci for Bub1-Tel and Bub3, and only one (or none) of these co-localised with Ndc80 (kinetochores).
