# Supplementary material for: Bub1 Is a Fission Yeast Kinetochore Scaffold Protein, and Is Sufficient to Recruit other Spindle Checkpoint Proteins to Ectopic Sites on Chromosomes
Source: PubMed Central journal article supplement (PMC2147072; doi:10.1371/journal.pone.0001342), 2007-12-19
Supplement: pone.0001342.s003.pdf [file pone.0001342.s003.pdf]

### Supplementary Table S3

**Number of Bub1/Mad3 dots co-localising with Pot1 (T, telomere)  
(shown as a %, 28 cells counted in total)**

|                    |                    |                    |                    |                    |                  |                  |                  |
|--------------------|--------------------|--------------------|--------------------|--------------------|------------------|------------------|------------------|
| 1B1/<br>1M3/<br>1T | 2B1/<br>2M3/<br>2T | 3B1/<br>3M3/<br>1T | 3B1/<br>3M3/<br>3T | 4B1/<br>4M3/<br>4T | 3B1/1T<br>2M3/1T | 4B1/4T<br>2M3/2T | 2B1/1T<br>1M3/1T |
| 58                 | 7                  | 3.5                | 14                 | 7                  | 3.5              | 3.5              | 3.5              |

Almost all cells contain at least one co-localising foci for Bub1-Tel and Mad3 that also co-localises with Pot1 (telomeres).
