# Supplementary material for: Bub1 Is a Fission Yeast Kinetochore Scaffold Protein, and Is Sufficient to Recruit other Spindle Checkpoint Proteins to Ectopic Sites on Chromosomes
Source: PubMed Central journal article supplement (PMC2147072; doi:10.1371/journal.pone.0001342), 2007-12-19
Supplement: pone.0001342.s004.pdf [file pone.0001342.s004.pdf]

#### Supplementary Table S4

**Number of Bub1/Bub3 dots co-localising with Pot1 (T, telomere)  
(shown as a %, 20 cells counted in total)**

|                    |                    |                    |                    |                    |                    |                  |
|--------------------|--------------------|--------------------|--------------------|--------------------|--------------------|------------------|
| 1B1/<br>1B3/<br>1T | 2B1/<br>2B3/<br>1T | 2B1/<br>2B3/<br>2T | 3B1/<br>3B3/<br>3T | 4B1/<br>4B3/<br>4T | 5B1/<br>5B3/<br>5T | 3B1/1T<br>4B3/4T |
| 5                  | 5                  | 20                 | 30                 | 25                 | 10                 | 5                |

Almost all cells contain at least one (and typically several) co-localising foci for Bub1-Tel and Bub3 that also co-localises with Pot1 (telomeres).
